# Supplementary material for: Prevalence and characteristics of healthcare utilization with different providers among Canadians with chronic back problems: A population-based study
Source: PubMed Central journal article supplement — Brain Spine. 2024 Apr 16;4:102812. doi: 10.1016/j.bas.2024.102812 (PMC11063586; doi:10.1016/j.bas.2024.102812), 2024-04-16
Supplement: mmc1.pdf [file mmc1.pdf]

## SUPPLEMENTAL FILE

**Title:** Prevalence and characteristics of healthcare utilization with different providers among Canadians with chronic back problems: A population-based study

**Authors:** Jessica J. Wong, DC, PhD; Dan Wang, PhD; Sheilah Hogg-Johnson, PhD; Silvano A. Mior, DC, PhD; Pierre Côté, DC, PhD

**Corresponding author:** Jessica J. Wong, DC, PhD, Institute for Disability and Rehabilitation Research, Ontario Tech University, 2000 Simcoe Street North, Oshawa, Ontario L1H 7K4, Canada; email: [jessica.wong@ontariotechu.ca](mailto:jessica.wong@ontariotechu.ca)

### Contents:

- **Appendix A1.** Questions from the Canadian Community Health Survey (CCHS) used to define covariates (sociodemographic, health-related and behavioural characteristics)
- **Appendix A2.** Flow diagram for study sample of Canadian Community Health Survey (CCHS) respondents from 2001 to 2010
- **Appendix A3.** Flow diagram for study sample Canadian Community Health Survey (CCHS) respondents from 2015/2016
- **Appendix A4.** Prevalence of consultations with health care professionals among Canadians with chronic back problems: Pooled analysis of CCHS 2001-2010
- **Appendix A5.** Prevalence of having received regular health care from different health professionals among Canadians with chronic back problems: CCHS 2015-2016

**Appendix A1.** Questions from the Canadian Community Health Survey (CCHS) used to define covariates (sociodemographic, health-related and behavioural characteristics)<sup>1-6</sup>

| Variable                                               | CCHS Question/Derived variable                                                                                                                                                                                        | Response                                                                                                                                                                                                                         | Regrouping                                                    |
|--------------------------------------------------------|-----------------------------------------------------------------------------------------------------------------------------------------------------------------------------------------------------------------------|----------------------------------------------------------------------------------------------------------------------------------------------------------------------------------------------------------------------------------|---------------------------------------------------------------|
| <b>Age*</b>                                            | This derived variable has been grouped as a form of disclosure control.<br>- Sourced survey question: <i>“What is your age?”</i>                                                                                      | 0-121 years                                                                                                                                                                                                                      | 1 12-19<br>2 20-34<br>3 35-49<br>4 50-64<br>5 65-79<br>6 80+  |
| <b>Sex</b>                                             | <i>“Is respondent male or female?”</i>                                                                                                                                                                                | 1 Male<br>2 Female                                                                                                                                                                                                               | /                                                             |
| <b>Province/territory of residence</b>                 | Administration information based on sample allocation                                                                                                                                                                 | 1 Newfoundland and Labrador<br>2 Prince Edward Island<br>3 Nova Scotia<br>4 New Brunswick<br>5 Quebec<br>6 Ontario<br>7 Manitoba<br>8 Saskatchewan<br>9 Alberta<br>10 British Columbia<br>11 Yukon/Northwest territories/Nunavut | /                                                             |
| <b>Cultural/racial background*</b><br>(CCHS 2001-2010) | This derived variable indicates the cultural or racial origin of the respondent.<br>- Sourced survey question: <i>“People living in Canada come from many different cultural and racial backgrounds. Are you...?”</i> | 1 ...White<br>2 ...Chinese<br>3 ...South Asian (e.g., East Indian, Pakistani, Sri Lankan, etc.)<br>4 ...Black<br>5 ...Filipino<br>6 ...Latin American                                                                            | 1 White<br>2 Non-white (Aboriginal or Other Visible Minority) |

|                                                        |                                                                                                                                                                                                                                             |                                                                                                                                                                                                                                                                                                                                                                                                                                                                           |                                                                                                                       |
|--------------------------------------------------------|---------------------------------------------------------------------------------------------------------------------------------------------------------------------------------------------------------------------------------------------|---------------------------------------------------------------------------------------------------------------------------------------------------------------------------------------------------------------------------------------------------------------------------------------------------------------------------------------------------------------------------------------------------------------------------------------------------------------------------|-----------------------------------------------------------------------------------------------------------------------|
|                                                        |                                                                                                                                                                                                                                             | <ul style="list-style-type: none"> <li>7 ...Southeast Asian (e.g., Cambodian, Indonesian, Laotian, Vietnamese, etc.)</li> <li>8 ...Arab</li> <li>9 ...West Asian (e.g., Afghan, Iranian, etc.)</li> <li>10 ...Japanese</li> <li>11 ...Korean</li> <li>12 ...Aboriginal Peoples of North America (North American Indian, Métis, Inuit / Eskimo)</li> <li>13 ... Other</li> </ul>                                                                                           |                                                                                                                       |
| <b>Cultural/racial background*</b><br>(CCHS 2015-2018) | <p>This derived variable indicates the cultural or racial background of the respondent.</p> <p>- Sourced survey question:</p> <p>a) <i>“you may belong to one or more racial or cultural groups on the following list. Are you...?”</i></p> | <ul style="list-style-type: none"> <li>1 ...White</li> <li>2 ...South Asian (e.g., East Indian, Pakistani, Sri Lankan, etc.)</li> <li>3 ...Chinese</li> <li>4 ...Black</li> <li>5 ...Filipino</li> <li>6 ...Latin American</li> <li>7 ...Arab</li> <li>8 ...Southeast Asian (e.g., Cambodian, Malaysian, Laotian, Vietnamese, etc.)</li> <li>9 ...West Asian (e.g., Afghan, Iranian, etc.)</li> <li>10 ...Korean</li> <li>11 ...Japanese</li> <li>12 ... Other</li> </ul> | <ul style="list-style-type: none"> <li>1 White</li> <li>2 Non-white (Aboriginal or Other Visible Minority)</li> </ul> |
|                                                        | <p>b) <i>“Are you an Aboriginal person, that is, First Nations, Métis or Inuk (Inuit)?”</i></p>                                                                                                                                             | <ul style="list-style-type: none"> <li>1 Yes</li> <li>2 No</li> </ul>                                                                                                                                                                                                                                                                                                                                                                                                     |                                                                                                                       |

|                                                 |                                                                                                                                                                                        |                                                                                                                                                                           |                                                                                                                                                      |
|-------------------------------------------------|----------------------------------------------------------------------------------------------------------------------------------------------------------------------------------------|---------------------------------------------------------------------------------------------------------------------------------------------------------------------------|------------------------------------------------------------------------------------------------------------------------------------------------------|
| <b>Immigrant status*</b>                        | a) Immigrant flag: this derived variable indicates if the respondent is an immigrant or not.                                                                                           | 1 Landed immigrant/non-permanent resident<br>2 Non-immigrant (Canadian born)                                                                                              | 1 Non-immigrant<br>2 Immigrant who lived in Canada for 0-9 years<br>3 Immigrant who lived in Canada for 10+ years                                    |
|                                                 | b) Length of time in Canada since immigration: this derived variable indicates the length of time in years the respondent became a landed immigrant.                                   | 1 0-9 years<br>2 >=10 years                                                                                                                                               |                                                                                                                                                      |
| <b>Education*</b><br>(CCHS 2001-2010)           | This derived variable indicates the highest level of education acquired by the respondent.                                                                                             | 1 Less than secondary school graduation<br>2 Secondary graduation, no post-secondary education<br>3 Some post-secondary degree/diploma<br>4 Post-secondary degree/diploma | /                                                                                                                                                    |
| <b>Education*</b><br>(CCHS2015-2018)            | This derived variable indicates the highest level of education attained by the respondent                                                                                              | 1 less than secondary graduation<br>2 Secondary school graduation, no post-secondary education<br>3 Post-secondary certificate/diploma or university degree               | /                                                                                                                                                    |
| <b>Total household income*</b> (CCHS 2001-2010) | This derived variable classifies the total household income into 5 categories based on total household income and the number of people living in the household.                        | 1 Lowest income<br>2 Lower middle income<br>3 Middle income<br>4 Upper middle income<br>5 Highest income<br>- Population exclusion: residents of territories              | /                                                                                                                                                    |
| <b>Total household income*</b> (CCHS 2015-2018) | This derived variable is a distribution of respondents in deciles (ten categories including approximately the same percentage of residents for each province) based on their value for | 1 Decile 1<br>2 Decile 2<br>3 Decile 3<br>...<br>...<br>9 Decile 9                                                                                                        | For each respondent, a relative measure of their household income to the household incomes of all other respondents:<br>1 Quintile 1<br>2 Quintile 2 |

|                                  |                                                                                                                                                                                                                           |                                                                                                                                                        |                                                                                                                                                 |
|----------------------------------|---------------------------------------------------------------------------------------------------------------------------------------------------------------------------------------------------------------------------|--------------------------------------------------------------------------------------------------------------------------------------------------------|-------------------------------------------------------------------------------------------------------------------------------------------------|
|                                  | NCDVADR, i.e., the adjusted ratio of their total household income to the low income cut-off corresponding to their household and community size.                                                                          | 10 Decile 10<br>- Population exclusion: residents of territories                                                                                       | 3 Quintile 3<br>4 Quintile 4<br>5 Quintile 5<br>- Population exclusion: residents of territories                                                |
| <b>Working status last week*</b> | a) <i>“Last week, did you work at a job or a business? Please include part-time jobs, seasonal work, contract work, self-employment, baby-sitting and any other paid work, regardless of the number of hours worked.”</i> | 1 Yes<br>2 No<br>3 Permanently unable to work<br>- Population exclusions: Age<15 or >75                                                                | 1 Worked at a job or business<br>2 Had a job but did not work(absent)<br>3 Permanently unable to work<br>- Population exclusions: Age<15 or >75 |
|                                  | b) <i>“Last week, did you have a job or business from which you were absent?”</i>                                                                                                                                         | 1 Yes<br>2 No                                                                                                                                          |                                                                                                                                                 |
| <b>Marital status</b>            | <i>“What is [household member name]’s marital status? Is [he/she]... ?”</i>                                                                                                                                               | 1 Married<br>2 Living common-law<br>3 Widowed<br>4 Separated<br>5 Divorced<br>6 Single, never married                                                  | 1 Married<br>2 Living common-law<br>3 Widowed/Separated/Divorced<br>4 Single, never married                                                     |
| <b>Type of smoker</b>            | <i>“At the present time, do you smoke cigarettes daily, occasionally or not at all?”</i>                                                                                                                                  | 1 Daily<br>2 Occasionally<br>3 Not at all                                                                                                              | /                                                                                                                                               |
| <b>Type of drinker*</b>          | a) <i>“During the past 12 months, how often did you drink alcoholic beverages?”</i>                                                                                                                                       | 1 Less than once a month<br>2 Once a month<br>3 2 to 3 times a month<br>4 Once a week<br>5 2 to 3 times a week<br>6 4 to 6 times a week<br>7 Every day | 1 Regular drinker<br>2 Occasional drinker<br>3 Never drank/Did not drink in the last 12 months                                                  |
|                                  | b) <i>“During the past 12 months, that is, from [date one year ago] to</i>                                                                                                                                                | 1 Yes<br>2 No                                                                                                                                          |                                                                                                                                                 |

|                                                  |                                                                                                                                                                                                                                                                                                                                 |                                                                                                                                                                                                                                                                                                                                                                                                                         |                                                                                                                                                       |
|--------------------------------------------------|---------------------------------------------------------------------------------------------------------------------------------------------------------------------------------------------------------------------------------------------------------------------------------------------------------------------------------|-------------------------------------------------------------------------------------------------------------------------------------------------------------------------------------------------------------------------------------------------------------------------------------------------------------------------------------------------------------------------------------------------------------------------|-------------------------------------------------------------------------------------------------------------------------------------------------------|
|                                                  | <i>yesterday, have you had a drink of beer, wine, liquor or any other alcoholic beverage?"</i>                                                                                                                                                                                                                                  |                                                                                                                                                                                                                                                                                                                                                                                                                         |                                                                                                                                                       |
| <b>Physical activity level*</b> (CCHS 2001-2010) | This derived variable categorizes respondent as being “active”, “moderate”, or “inactive” based on the total daily Energy Expenditure values (kcal/kg/day). The Physical Activity Index follows the same criteria used to categorize individuals in the Ontario Health Survey (OHS) and in the Campbell’s Survey on Well Being. | Energy Expenditure is calculated using the frequency and duration per session of the physical activity as well as the MET value of the activity. The MET is a value of metabolic energy cost expressed as a multiple of the resting metabolic rate. For example, an activity of 4 METS requires four times the amount of energy as compared to when the body is at rest.<br>1 Active<br>2 Moderate active<br>3 Inactive | /                                                                                                                                                     |
| <b>Physical activity level*</b> (CCHS 2015-2018) | This derived variable indicates whether a respondent is physically active according to the recommended level from Canadian Physical Activity Guidelines (CPAG): at least 150 minutes of moderate- to vigorous-intensity aerobic physical activity per week, in bouts of 10 minutes or more.                                     | Based on the total number of minutes a respondent engaged in active transportation and moderate to vigorous recreational and other physical activities:<br>1 Physically active at / above recommended level from CPAG<br>2 Physically active below recommended level from CPAG<br>3 No physical activity minutes reported                                                                                               | /                                                                                                                                                     |
| <b>Body mass index*</b>                          | A derived variable assigns adult respondents aged 18 and over (except pregnant women) to one of the following categories, according to their Body Mass Index (BMI) and based on classification system recommended by Health Canada                                                                                              | 1 Underweight<br>2 Normal/Acceptable weight<br>3 Overweight<br>4 Obese class I, II, or III (available for CCHS 2003-2018)<br>- Population exclusion: age<18 or pregnant women                                                                                                                                                                                                                                           | 1 Underweight<br>2 Normal/Acceptable weight<br>3 Overweight (including Obese class I, II, or III)<br>- Population exclusion: age<18 or pregnant women |

|                                      |                                                        |                                                          |   |
|--------------------------------------|--------------------------------------------------------|----------------------------------------------------------|---|
|                                      | and the World Health Organization                      |                                                          |   |
| <b>Self-perceived general health</b> | <i>“In general, would you say your health is... ?”</i> | 1 Excellent<br>2 Very good<br>3 Good<br>4 Fair<br>5 Poor | / |

\* Derived variables are produced by Statistics Canada for Public Use Microdata File (PUMF) of Canadian Community Health Survey, accessed via Ontario Data Documentation, Extraction Service and Infrastructure Initiative.

**Appendix A2.** Flow diagram for study sample of Canadian Community Health Survey (CCHS) respondents from 2001 to 2010

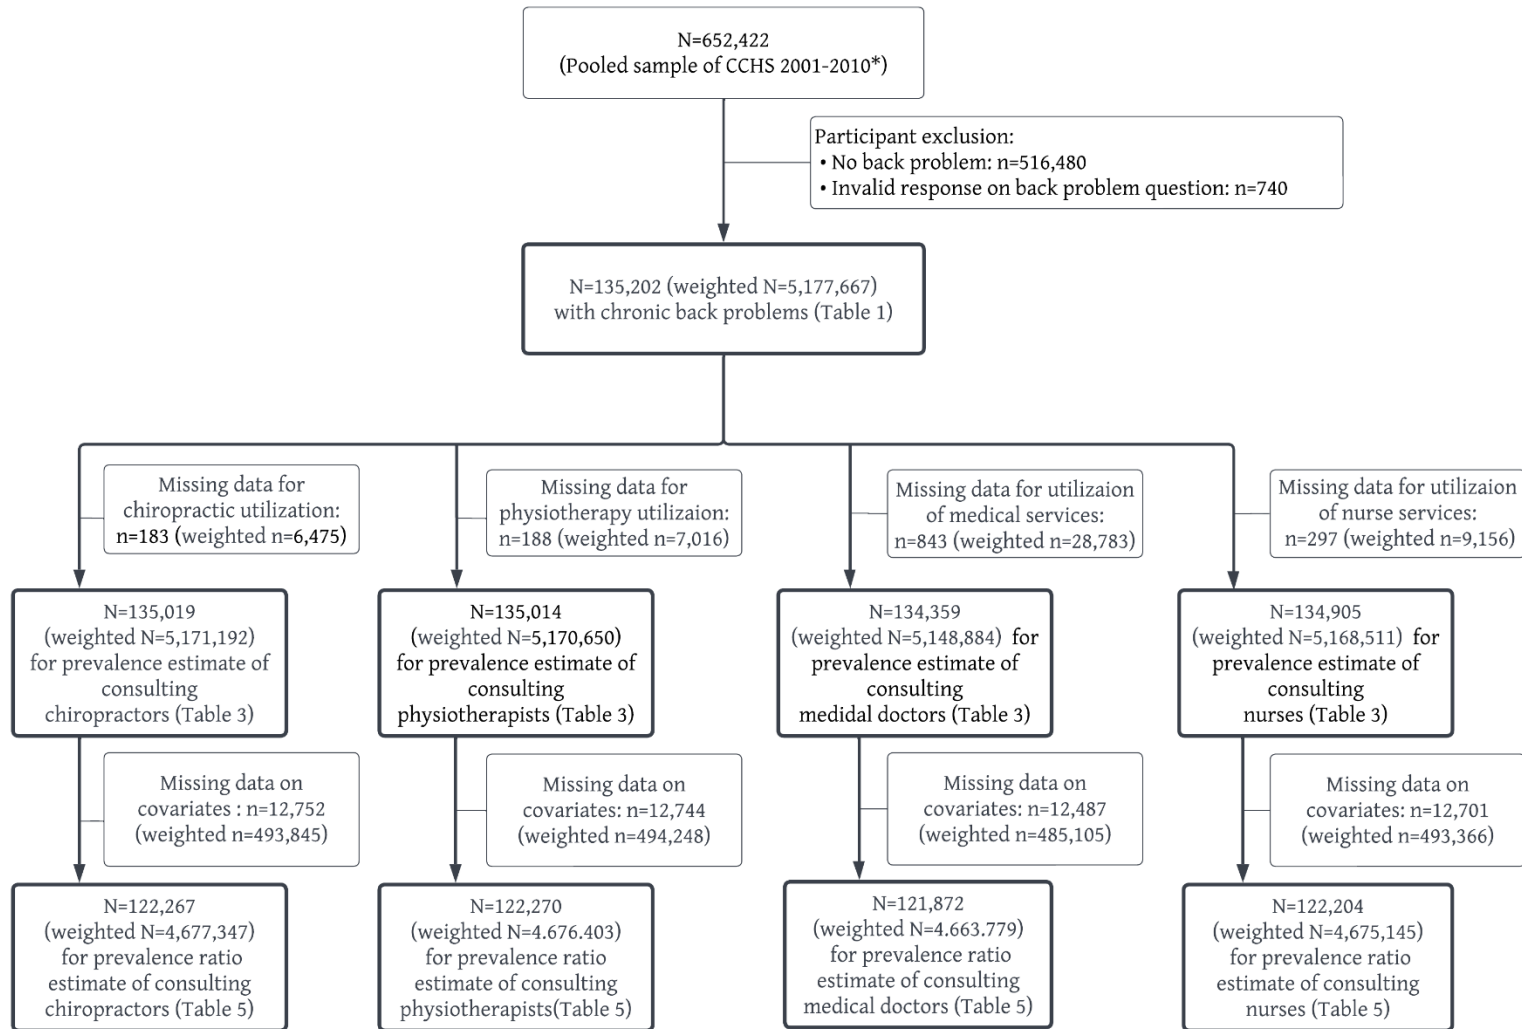

\*: Data source: Public Use Microdata File of Canadian Community Health Survey(2001-2010) produced by Statistics Canada and accessed via Ontario Data Documentation, Extraction Service and Infrastructure Initiative.



**Appendix A3.** Flow diagram for study sample of Canadian Community Health Survey (CCHS) respondents from 2015/2016

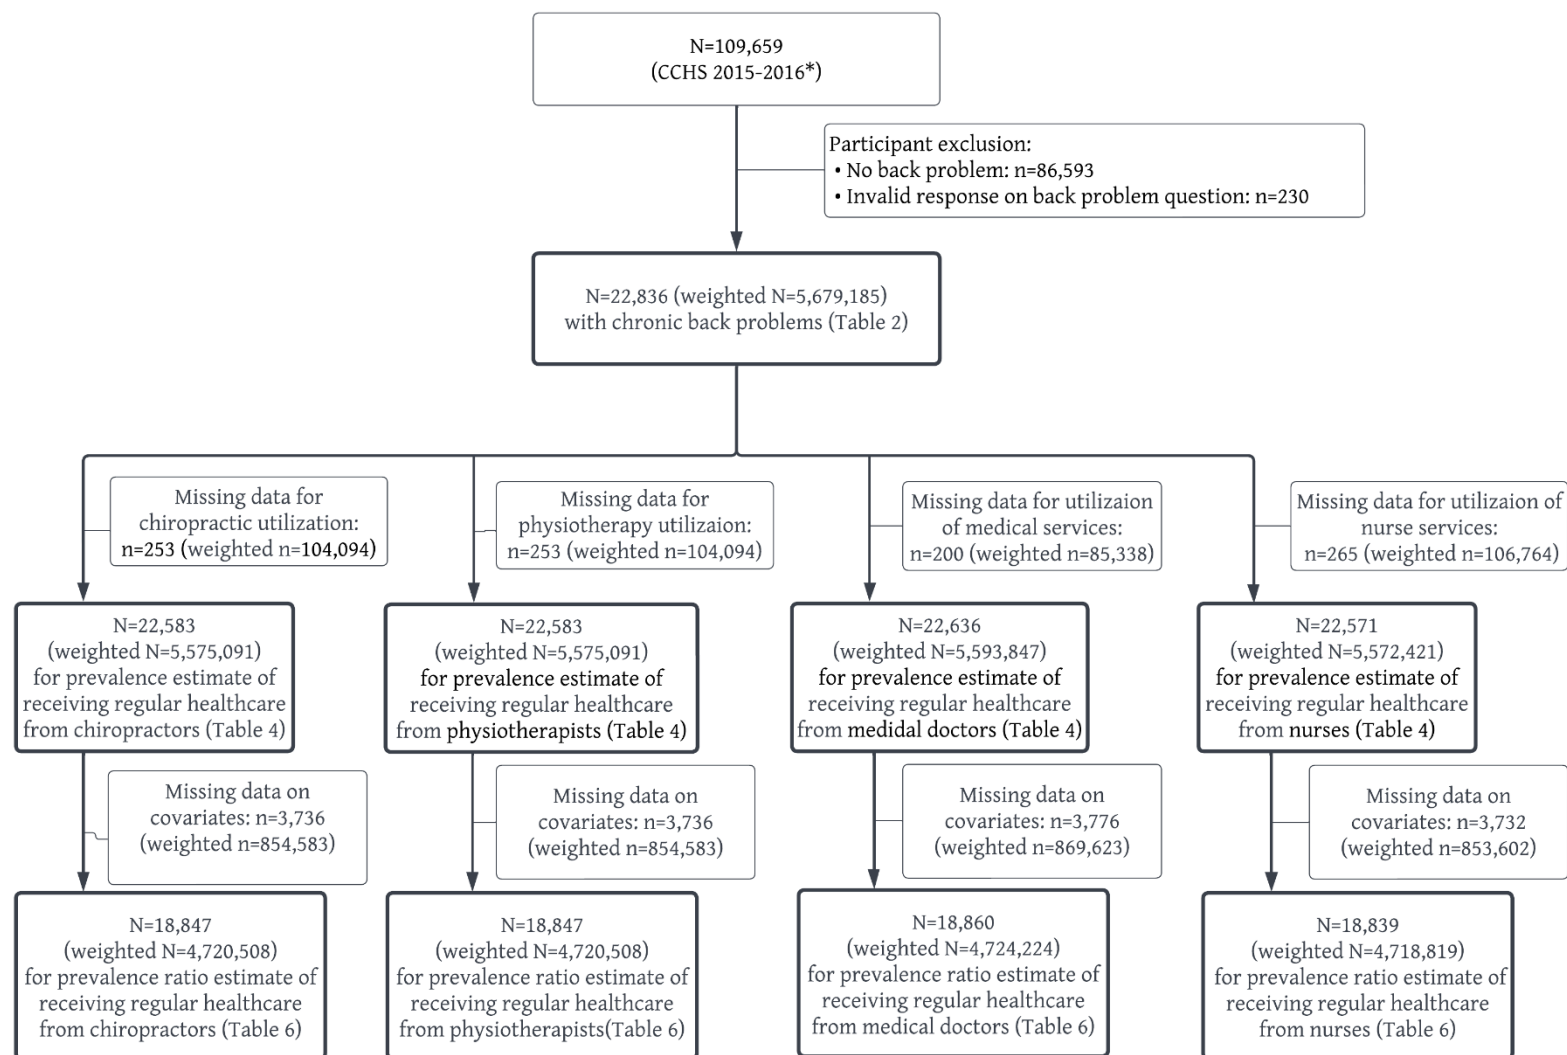

\*: Data source: Public Use Microdata File of Canadian Community Health Survey(2015-2016) produced by Statistics Canada and accessed via Ontario Data Documentation, Extraction Service and Infrastructure Initiative.

**Appendix A4.** Prevalence of consultations with health care professionals among Canadians with chronic back problems: Pooled analysis of CCHS 2001-2010\*

|                              |                   | <b>Prevalence (95%) of consultations with health care professionals</b> |                     |                        |                   |
|------------------------------|-------------------|-------------------------------------------------------------------------|---------------------|------------------------|-------------------|
| <b>Characteristics</b>       | <b>Weighted N</b> | <b>Medical doctor(incl. specialists)</b>                                | <b>Chiropractor</b> | <b>Physiotherapist</b> | <b>Nurse</b>      |
| <b>Overall prevalence</b>    | 5177667           | 87.9(87.6 - 88.2)                                                       | 24.0(23.6 - 24.4)   | 17.2(16.9 - 17.6)      | 14.0(13.7 - 14.2) |
| <b>Age group (years)</b>     |                   |                                                                         |                     |                        |                   |
| 12-19                        | 153438            | 82.1 (80.4-83.8)                                                        | 30.7 (28.7-32.8)    | 18.9 (17.2-20.5)       | 16.3 (14.8-17.9)  |
| 20-34                        | 968514            | 84.2 (83.5-85.0)                                                        | 27.8 (26.9-28.8)    | 18.0 (17.2-18.8)       | 17.3 (16.6-18.0)  |
| 35-49                        | 1626494           | 85.1 (84.5-85.7)                                                        | 27.6 (26.8-28.3)    | 18.9 (18.2-19.6)       | 13.0 (12.5-13.6)  |
| 50-64                        | 1460551           | 90.1 (89.6-90.6)                                                        | 22.7 (22.0-23.4)    | 17.1 (16.4-17.7)       | 12.0 (11.5-12.5)  |
| 65-79                        | 753250            | 93.8 (93.4-94.2)                                                        | 16.3 (15.7-17.0)    | 14.1 (13.5-14.8)       | 13.0 (12.4-13.7)  |
| ≥80                          | 215419            | 95.0 (94.3-95.6)                                                        | 10.8 ( 9.8-11.7)    | 12.2 (11.2-13.2)       | 20.6 (19.3-21.9)  |
| <b>Sex</b>                   |                   |                                                                         |                     |                        |                   |
| Male                         | 2438085           | 82.9 (82.4-83.4)                                                        | 24.2 (23.6-24.8)    | 16.0 (15.5-16.5)       | 11.3 (10.9-11.7)  |
| Female                       | 2739582           | 92.4 (92.1-92.7)                                                        | 23.9 (23.4-24.4)    | 18.3 (17.9-18.8)       | 16.3 (15.9-16.7)  |
| <b>Province of residence</b> |                   |                                                                         |                     |                        |                   |
| Newfoundland                 | 84353             | 92.0 (90.9-93.1)                                                        | 11.9 (10.5-13.3)    | 14.3 (12.7-15.9)       | 13.7 (12.2-15.2)  |
| Prince Edward Island         | 21198             | 89.9 (88.1-91.8)                                                        | 10.6 ( 8.7-12.5)    | 17.4 (15.2-19.7)       | 13.6 (11.7-15.5)  |
| Nova Scotia                  | 168551            | 91.4 (90.4-92.5)                                                        | 11.5 (10.2-12.7)    | 18.8 (17.3-20.3)       | 12.1 (11.0-13.2)  |
| New Brunswick                | 129342            | 89.7 (88.5-90.8)                                                        | 12.7 (11.4-13.9)    | 16.7 (15.3-18.2)       | 14.3 (13.1-15.6)  |
| Quebec                       | 1056063           | 84.0 (83.2-84.8)                                                        | 18.0 (17.2-18.7)    | 15.6 (14.9-16.4)       | 18.7 (18.0-19.5)  |
| Ontario                      | 2066139           | 89.1 (88.6-89.5)                                                        | 24.0 (23.4-24.6)    | 16.2 (15.6-16.8)       | 13.2 (12.7-13.7)  |
| Manitoba                     | 180427            | 86.8 (85.5-88.0)                                                        | 34.5 (32.7-36.3)    | 19.0 (17.6-20.5)       | 12.5 (11.3-13.8)  |

|                                           |                   | <b>Prevalence (95%) of consultations with health care professionals</b> |                     |                        |                  |
|-------------------------------------------|-------------------|-------------------------------------------------------------------------|---------------------|------------------------|------------------|
| <b>Characteristics</b>                    | <b>Weighted N</b> | <b>Medical doctor(incl. specialists)</b>                                | <b>Chiropractor</b> | <b>Physiotherapist</b> | <b>Nurse</b>     |
| Saskatchewan                              | 161018            | 89.2 (88.3-90.2)                                                        | 31.7 (30.2-33.2)    | 16.1 (14.9-17.4)       | 12.9 (11.9-14.0) |
| Alberta                                   | 531226            | 87.2 (86.3-88.1)                                                        | 34.3 (32.9-35.6)    | 19.2 (18.0-20.3)       | 12.8 (11.9-13.7) |
| British Columbia                          | 766805            | 89.1 (88.4-89.8)                                                        | 27.7 (26.8-28.7)    | 20.7 (19.8-21.5)       | 10.8 (10.2-11.4) |
| Yukon, Northwest Territories and Nunavut  | 12545             | 81.1 (78.8-83.4)                                                        | 15.2 (13.2-17.1)    | 17.7 (15.7-19.8)       | 32.4 (29.9-34.9) |
| <b>Cultural/racial background</b>         |                   |                                                                         |                     |                        |                  |
| White                                     | 4360237           | 88.1 (87.8-88.4)                                                        | 25.1 (24.7-25.5)    | 16.9 (16.6-17.3)       | 14.3 (14.0-14.7) |
| Non-white                                 | 675691            | 87.6 (86.6-88.5)                                                        | 18.4 (17.2-19.6)    | 19.1 (17.8-20.3)       | 11.4 (10.6-12.3) |
| <b>Immigrant status</b>                   |                   |                                                                         |                     |                        |                  |
| Non-immigrant                             | 4038148           | 87.5 (87.2-87.8)                                                        | 25.6 (25.2-26.1)    | 17.0 (16.7-17.4)       | 15.0 (14.7-15.3) |
| Immigrant(0-9 years)                      | 171453            | 86.7 (84.7-88.7)                                                        | 17.2 (14.7-19.7)    | 19.5 (16.9-22.2)       | 9.0 ( 7.4-10.7)  |
| Immigrant(≥10 years)                      | 845610            | 90.7 (89.9-91.4)                                                        | 18.6 (17.6-19.6)    | 17.7 (16.7-18.8)       | 9.9 ( 9.2-10.7)  |
| <b>Highest level of education</b>         |                   |                                                                         |                     |                        |                  |
| Less than secondary                       | 1165673           | 87.5 (86.9-88.0)                                                        | 17.3 (16.7-18.0)    | 12.7 (12.1-13.3)       | 13.4 (12.9-14.0) |
| Secondary graduate                        | 850607            | 86.8 (86.1-87.5)                                                        | 24.8 (23.9-25.8)    | 15.8 (14.9-16.6)       | 12.6 (11.9-13.3) |
| Some post-secondary education             | 404047            | 88.3 (87.1-89.4)                                                        | 26.8 (25.3-28.2)    | 17.3 (16.2-18.5)       | 15.5 (14.4-16.6) |
| Post-secondary graduate/university degree | 2629333           | 88.6 (88.2-89.0)                                                        | 26.7 (26.1-27.2)    | 19.7 (19.2-20.2)       | 14.4 (14.0-14.9) |
| <b>Total household income</b>             |                   |                                                                         |                     |                        |                  |
| 1st quintile                              | 695108            | 88.5 (87.7-89.3)                                                        | 13.6 (12.8-14.4)    | 13.0 (12.1-13.8)       | 16.8 (15.9-17.6) |
| 2nd quintile                              | 689621            | 87.9 (87.0-88.7)                                                        | 20.4 (19.3-21.4)    | 15.5 (14.6-16.5)       | 14.5 (13.8-15.3) |
| 3rd quintile                              | 906331            | 88.5 (87.9-89.2)                                                        | 24.4 (23.5-25.4)    | 16.4 (15.6-17.1)       | 13.9 (13.2-14.5) |
| 4th quintile                              | 1104385           | 87.4 (86.7-88.0)                                                        | 28.1 (27.2-28.9)    | 18.7 (18.0-19.4)       | 12.9 (12.4-13.5) |

|                                 |                   | <b>Prevalence (95%) of consultations with health care professionals</b> |                     |                        |                  |
|---------------------------------|-------------------|-------------------------------------------------------------------------|---------------------|------------------------|------------------|
| <b>Characteristics</b>          | <b>Weighted N</b> | <b>Medical doctor(incl. specialists)</b>                                | <b>Chiropractor</b> | <b>Physiotherapist</b> | <b>Nurse</b>     |
| 5th quintile                    | 1033120           | 87.9 (87.3-88.5)                                                        | 30.7 (29.8-31.7)    | 21.0 (20.2-21.9)       | 13.0 (12.3-13.7) |
| NS/NA†                          | 749101            | 87.4 (86.7-88.2)                                                        | 21.3 (20.4-22.2)    | 16.4 (15.5-17.2)       | 13.7 (13.0-14.4) |
| <b>Working status last week</b> |                   |                                                                         |                     |                        |                  |
| Working                         | 2753985           | 85.0 (84.5-85.4)                                                        | 29.0 (28.4-29.5)    | 17.4 (16.9-17.9)       | 11.8 (11.4-12.2) |
| Absent                          | 258068            | 89.8 (88.5-91.1)                                                        | 27.9 (26.1-29.7)    | 27.7 (25.9-29.5)       | 19.8 (18.3-21.3) |
| No job                          | 1348962           | 90.5 (90.1-91.0)                                                        | 19.1 (18.5-19.7)    | 15.8 (15.2-16.4)       | 14.7 (14.1-15.2) |
| Unable/permanent                | 256875            | 96.2 (95.5-96.8)                                                        | 12.3 (11.0-13.5)    | 18.3 (16.8-19.8)       | 21.6 (20.2-23.0) |
| NA(age <15 or >75)              | 457744            | 93.2 (92.6-93.7)                                                        | 14.2 (13.4-15.0)    | 13.5 (12.7-14.3)       | 17.7 (16.9-18.6) |
| <b>Marital status</b>           |                   |                                                                         |                     |                        |                  |
| Married                         | 2809757           | 89.3 (88.9-89.7)                                                        | 25.1 (24.6-25.7)    | 17.5 (17.0-18.0)       | 12.1 (11.7-12.5) |
| Common-law                      | 515814            | 82.9 (81.9-84.0)                                                        | 24.5 (23.3-25.7)    | 16.9 (15.8-18.0)       | 15.7 (14.7-16.6) |
| Widowed/Divorced/Separated      | 827494            | 91.4 (90.9-91.9)                                                        | 18.6 (17.8-19.3)    | 15.7 (15.1-16.4)       | 16.0 (15.3-16.6) |
| Single                          | 1016061           | 83.8 (83.0-84.5)                                                        | 25.2 (24.3-26.0)    | 17.8 (17.1-18.5)       | 16.6 (15.9-17.3) |
| <b>Type of smoker</b>           |                   |                                                                         |                     |                        |                  |
| Daily                           | 1180476           | 84.0 (83.4-84.7)                                                        | 19.2 (18.4-19.9)    | 14.1 (13.4-14.8)       | 14.2 (13.6-14.8) |
| Occasional                      | 242317            | 86.2 (84.8-87.6)                                                        | 25.6 (23.7-27.5)    | 16.7 (15.0-18.4)       | 15.4 (14.0-16.8) |
| Not at all                      | 3736084           | 89.3 (88.9-89.6)                                                        | 25.5 (25.0-25.9)    | 18.2 (17.8-18.7)       | 13.8 (13.5-14.1) |
| <b>Type of drinker</b>          |                   |                                                                         |                     |                        |                  |
| Regular                         | 3086270           | 86.6 (86.2-87.0)                                                        | 26.5 (25.9-27.0)    | 17.9 (17.5-18.4)       | 12.9 (12.5-13.3) |
| Occasional                      | 942035            | 89.6 (89.0-90.3)                                                        | 23.0 (22.1-23.8)    | 16.4 (15.7-17.1)       | 15.3 (14.7-16.0) |
| Did not drink                   | 1070831           | 90.4 (89.9-91.0)                                                        | 18.3 (17.5-19.0)    | 15.9 (15.1-16.6)       | 15.8 (15.2-16.5) |

|                                 |                   | <b>Prevalence (95%) of consultations with health care professionals</b> |                     |                        |                  |
|---------------------------------|-------------------|-------------------------------------------------------------------------|---------------------|------------------------|------------------|
| <b>Characteristics</b>          | <b>Weighted N</b> | <b>Medical doctor(incl. specialists)</b>                                | <b>Chiropractor</b> | <b>Physiotherapist</b> | <b>Nurse</b>     |
| <b>Physical activity</b>        |                   |                                                                         |                     |                        |                  |
| Active                          | 1084632           | 86.0 (85.3-86.7)                                                        | 27.8 (26.9-28.7)    | 20.1 (19.3-20.9)       | 13.9 (13.3-14.6) |
| Moderate active                 | 1182652           | 88.6 (88.0-89.1)                                                        | 26.6 (25.9-27.4)    | 18.4 (17.7-19.0)       | 13.8 (13.2-14.4) |
| Inactive                        | 2740793           | 88.2 (87.8-88.6)                                                        | 21.8 (21.2-22.3)    | 15.7 (15.2-16.1)       | 13.9 (13.6-14.3) |
| <b>BMI</b>                      |                   |                                                                         |                     |                        |                  |
| Underweight                     | 133840            | 89.6 (88.0-91.2)                                                        | 19.9 (17.7-22.1)    | 17.8 (15.7-19.8)       | 16.5 (14.7-18.4) |
| Normal weight                   | 1900439           | 86.5 (86.0-87.1)                                                        | 24.3 (23.7-25.0)    | 18.0 (17.4-18.5)       | 13.6 (13.1-14.1) |
| Overweight (incl. obese)        | 2626192           | 88.6 (88.3-89.0)                                                        | 24.3 (23.7-24.8)    | 16.9 (16.4-17.3)       | 13.5 (13.1-13.9) |
| NA(age<18 or pregnant)†         | 331682            | 87.5 (86.5-88.5)                                                        | 24.2 (22.9-25.5)    | 17.0 (15.9-18.1)       | 15.9 (14.9-17.0) |
| <b>Perceived general health</b> |                   |                                                                         |                     |                        |                  |
| Poor                            | 355517            | 96.8 (96.2-97.3)                                                        | 13.5 (12.5-14.6)    | 20.6 (19.4-21.8)       | 24.8 (23.5-26.0) |
| Fair                            | 834648            | 93.5 (93.0-94.0)                                                        | 17.4 (16.6-18.2)    | 17.5 (16.6-18.3)       | 17.3 (16.6-18.0) |
| Good                            | 1745341           | 88.3 (87.8-88.8)                                                        | 23.9 (23.2-24.5)    | 17.2 (16.6-17.7)       | 13.4 (12.9-13.8) |
| Very good                       | 1610222           | 85.6 (85.1-86.2)                                                        | 27.8 (27.1-28.5)    | 16.7 (16.1-17.4)       | 12.0 (11.4-12.5) |
| Excellent                       | 625295            | 80.4 (79.3-81.5)                                                        | 29.5 (28.3-30.7)    | 16.4 (15.4-17.5)       | 10.2 ( 9.4-10.9) |
| <b>CCHS survey cycle</b>        |                   |                                                                         |                     |                        |                  |
| 2001                            | 905678            | 88.9 (88.3-89.5)                                                        | 25.9 (25.1-26.7)    | 17.8 (17.1-18.5)       | 12.1 (11.5-12.7) |
| 2003                            | 1043833           | 87.4 (86.8-88.1)                                                        | 24.0 (23.2-24.9)    | 16.0 (15.3-16.7)       | 13.2 (12.5-13.8) |
| 2005                            | 1017931           | 87.2 (86.6-87.8)                                                        | 24.0 (23.2-24.8)    | 16.8 (16.1-17.5)       | 14.2 (13.6-14.8) |
| 2007                            | 1129597           | 87.0 (86.4-87.7)                                                        | 22.8 (22.0-23.6)    | 16.9 (16.2-17.6)       | 14.6 (13.9-15.2) |
| 2009                            | 1080627           | 89.1 (88.4-89.8)                                                        | 23.6 (22.6-24.6)    | 18.6 (17.6-19.6)       | 15.4 (14.7-16.1) |

BMI – body mass index; CCHS – Canadian Community Health Survey; CI – confidence interval; NA – not applicable; NS – not stated; PR – prevalence ratio

\*Weighted using Canadian Community Health Survey sampling weights provided by Statistics Canada to provide population estimates; public use microdata file used (without bootstrap weights; only scaled sampling weight applied)

†NA=not applicable according to population exclusions; NS=not stated or responses without enough information for classification

**Appendix A5. Prevalence of having received regular health care from different health professionals among Canadians with chronic back problems: CCHS 2015-2016**

|                        |                   | <b>Prevalence (95% CI) of having received regular health care from different health professionals</b> |                     |                        |                 |
|------------------------|-------------------|-------------------------------------------------------------------------------------------------------|---------------------|------------------------|-----------------|
| <b>Characteristics</b> | <b>Weighted N</b> | <b>Medical doctor (incl. specialists)</b>                                                             | <b>Chiropractor</b> | <b>Physiotherapist</b> | <b>Nurse</b>    |
| Overall prevalence     | 5679185           | 86.7 (85.8 - 87.6)                                                                                    | 14.5 (13.7 - 15.3)  | 10.7 (10.0 - 11.4)     | 6.6 (6.1 - 7.0) |
| Age group (years)      |                   |                                                                                                       |                     |                        |                 |
| 12-19                  | 152259            | 79.6 (74.3-85.0)                                                                                      | 16.4 (11.7-21.1)    | 19.7 (11.9-27.5)       | 4.6 (1.5- 7.6)  |
| 20-34                  | 892353            | 73.2 (68.3-78.1)                                                                                      | 13.1 (11.5-14.7)    | 9.3 (7.9-10.8)         | 5.3 (4.2- 6.4)  |
| 35-49                  | 1373547           | 83.9 (81.3-86.6)                                                                                      | 18.4 (15.9-20.8)    | 11.5 (9.6-13.5)        | 5.4 (3.5- 7.2)  |
| 50-64                  | 1855816           | 89.3 (87.4-91.2)                                                                                      | 14.4 (13.1-15.6)    | 10.8 (8.9-12.8)        | 6.4 (5.4- 7.3)  |
| 65-79                  | 1114184           | 95.6 (95.0-96.2)                                                                                      | 13.0 (11.6-14.3)    | 10.0 (8.3-11.7)        | 8.2 (7.2- 9.1)  |
| ≥80                    | 291026            | 94.8 (93.6-96.1)                                                                                      | 6.7 (5.7- 7.7)      | 8.0 (5.5-10.5)         | 12.5 (8.3-16.8) |
| Sex                    |                   |                                                                                                       |                     |                        |                 |
| Male                   | 2715722           | 84.0 (83.5-84.5)                                                                                      | 14.5 (13.1-15.8)    | 9.4 (8.2-10.6)         | 5.6 (5.0- 6.3)  |
| Female                 | 2963464           | 89.2 (87.8-90.6)                                                                                      | 14.6 (13.3-15.8)    | 11.9 (10.3-13.5)       | 7.4 (6.8- 8.1)  |
| Province of residence  |                   |                                                                                                       |                     |                        |                 |
| Newfoundland           | 100582            | 92.9 (88.2-97.6)                                                                                      | 12.9 (9.0-16.9)     | 10.2 (5.0-15.5)        | 10.4 (5.1-15.7) |
| Prince Edward Island   | 22574             | 92.5 (89.6-95.4)                                                                                      | 8.5 (5.9-11.1)      | 11.6 (7.6-15.5)        | 9.0 (5.2-12.8)  |
| Nova Scotia            | 191084            | 90.3 (87.2-93.4)                                                                                      | 12.0 (8.7-15.4)     | 10.3 (8.6-12.1)        | 8.6 (7.7- 9.4)  |
| New Brunswick          | 138278            | 91.3 (88.8-93.9)                                                                                      | 8.5 (6.3-10.7)      | 9.3 (6.9-11.6)         | 7.7 (5.3-10.1)  |
| Quebec                 | 1238378           | 76.9 (74.3-79.5)                                                                                      | 8.6 (6.6-10.5)      | 8.8 (7.6-10.0)         | 7.3 (5.7- 8.8)  |

|                                           |                   | <b>Prevalence (95% CI) of having received regular health care from different health professionals</b> |                     |                        |                 |
|-------------------------------------------|-------------------|-------------------------------------------------------------------------------------------------------|---------------------|------------------------|-----------------|
| <b>Characteristics</b>                    | <b>Weighted N</b> | <b>Medical doctor (incl. specialists)</b>                                                             | <b>Chiropractor</b> | <b>Physiotherapist</b> | <b>Nurse</b>    |
| Ontario                                   | 2167335           | 92.1 (91.1-93.0)                                                                                      | 16.1 (15.2-16.9)    | 10.8 (9.2-12.5)        | 7.5 (5.6- 9.5)  |
| Manitoba                                  | 198888            | 86.9 (84.1-89.7)                                                                                      | 19.1 (14.6-23.6)    | 15.0 (11.0-18.9)       | 7.2 (5.9- 8.5)  |
| Saskatchewan                              | 170695            | 86.2 (82.7-89.7)                                                                                      | 25.4 (22.9-27.9)    | 14.9 (9.0-20.8)        | 9.6 (7.9-11.3)  |
| Alberta                                   | 624265            | 85.2 (80.6-89.7)                                                                                      | 19.4 (14.8-24.1)    | 11.3 (8.7-13.8)        | 4.4 (3.5- 5.3)  |
| British Columbia                          | 808536            | 87.3 (85.6-88.9)                                                                                      | 14.6 (11.7-17.5)    | 11.4 (8.1-14.7)        | 2.5 (1.6- 3.4)  |
| Yukon, Northwest Territories, and Nunavut | 18571             | 43.5 (35.7-51.2)                                                                                      | 7.6 (4.3-10.9)      | 8.0 (4.8-11.3)         | 12.0 (6.8-17.2) |
| Cultural/racial background                |                   |                                                                                                       |                     |                        |                 |
| White                                     | 4395169           | 87.3 (86.3-88.3)                                                                                      | 15.8 (14.6-17.1)    | 10.8 (10.2-11.4)       | 7.0 (6.3- 7.6)  |
| Non-white                                 | 1075890           | 84.2 (81.9-86.5)                                                                                      | 9.7 (7.5-11.8)      | 10.7 (6.8-14.6)        | 5.0 (3.2- 6.8)  |
| Immigrant status                          |                   |                                                                                                       |                     |                        |                 |
| Non-immigrant                             | 4304899           | 86.2 (85.5-86.9)                                                                                      | 15.9 (14.4-17.3)    | 10.5 (9.5-11.5)        | 7.2 (6.4- 7.9)  |
| Immigrant(0-9 years)                      | 193228            | 73.8 (63.8-83.8)                                                                                      | 7.0 (4.1- 9.8)      | 6.2 (1.1-11.3)         | 2.3 (0.0- 5.5)  |
| Immigrant(≥10 years)                      | 947396            | 91.6 (90.4-92.8)                                                                                      | 11.0 (9.8-12.2)     | 13.2 (10.6-15.7)       | 4.9 (3.0- 6.9)  |
| Highest level of education                |                   |                                                                                                       |                     |                        |                 |
| Less than secondary                       | 975414            | 85.9 (83.2-88.5)                                                                                      | 10.0 (9.3-10.6)     | 6.9 (5.0- 8.9)         | 8.0 (6.2- 9.9)  |
| Secondary graduate                        | 1267576           | 87.5 (85.0-90.0)                                                                                      | 13.8 (12.1-15.6)    | 9.0 (7.5-10.5)         | 6.5 (4.7- 8.4)  |
| Some post-secondary education             | 3353680           | 86.7 (85.5-87.9)                                                                                      | 16.3 (14.5-18.1)    | 12.5 (11.3-13.6)       | 6.2 (5.4- 7.0)  |



|                                        |                   | <b>Prevalence (95% CI) of having received regular health care from different health professionals</b> |                     |                        |                 |
|----------------------------------------|-------------------|-------------------------------------------------------------------------------------------------------|---------------------|------------------------|-----------------|
| <b>Characteristics</b>                 | <b>Weighted N</b> | <b>Medical doctor (incl. specialists)</b>                                                             | <b>Chiropractor</b> | <b>Physiotherapist</b> | <b>Nurse</b>    |
| Distribution of total household income |                   |                                                                                                       |                     |                        |                 |
| 1st quintile                           | 1240789           | 83.3 (80.9-85.7)                                                                                      | 7.3 (5.8- 8.8)      | 6.2 (4.5- 8.0)         | 7.4 (6.3- 8.4)  |
| 2nd quintile                           | 1181106           | 86.3 (83.9-88.7)                                                                                      | 10.8 (8.1-13.5)     | 8.3 (7.2- 9.3)         | 6.5 (5.3- 7.8)  |
| 3rd quintile                           | 1193127           | 87.7 (85.7-89.7)                                                                                      | 14.6 (13.6-15.7)    | 10.9 (8.6-13.2)        | 6.4 (5.7- 7.2)  |
| 4th quintile                           | 1020416           | 88.0 (86.0-89.9)                                                                                      | 19.6 (16.9-22.2)    | 13.4 (11.2-15.6)       | 6.7 (5.5- 7.8)  |
| 5th quintile                           | 1022285           | 89.6 (87.6-91.5)                                                                                      | 22.3 (18.2-26.5)    | 15.8 (13.3-18.3)       | 5.6 (4.0- 7.2)  |
| NA(residents of territories)†          | 18211             | 44.3 (35.9-52.8)                                                                                      | 7.8 (4.2-11.3)      | 8.2 (4.9-11.5)         | 11.9 (7.1-16.7) |
| Working status last week               |                   |                                                                                                       |                     |                        |                 |
| Working                                | 2796283           | 83.4 (81.5-85.3)                                                                                      | 17.7 (15.6-19.9)    | 11.3 (10.2-12.3)       | 4.8 (3.9- 5.7)  |
| Absent                                 | 298633            | 85.8 (79.5-92.0)                                                                                      | 20.0 (11.0-28.9)    | 15.8 (9.9-21.8)        | 7.4 (4.1-10.7)  |
| No job                                 | 1866849           | 89.6 (87.3-91.8)                                                                                      | 10.8 (9.2-12.4)     | 9.7 (8.0-11.4)         | 8.0 (7.0- 9.1)  |
| NA(age <15 or >75)†                    | 579002            | 94.7 (92.6-96.8)                                                                                      | 9.0 (6.8-11.2)      | 9.1 (5.6-12.6)         | 10.1 (7.7-12.5) |
| Marital status                         |                   |                                                                                                       |                     |                        |                 |
| Married                                | 2859623           | 91.4 (90.5-92.4)                                                                                      | 17.0 (15.3-18.8)    | 11.4 (9.3-13.6)        | 6.6 (5.4- 7.7)  |
| Common-law                             | 712836            | 82.3 (80.2-84.4)                                                                                      | 14.4 (10.7-18.0)    | 9.6 (6.5-12.7)         | 6.2 (3.6- 8.8)  |
| Widowed/Divorced/Separated             | 948310            | 90.1 (88.9-91.3)                                                                                      | 10.8 (9.2-12.4)     | 10.3 (6.9-13.8)        | 8.0 (6.9- 9.1)  |
| Single                                 | 1144408           | 75.1 (70.6-79.7)                                                                                      | 11.5 (9.9-13.1)     | 9.8 (7.9-11.7)         | 5.7 (4.5- 6.9)  |
| Type of smoker                         |                   |                                                                                                       |                     |                        |                 |

|                                             |                   | <b>Prevalence (95% CI) of having received regular health care from different health professionals</b> |                     |                        |                |
|---------------------------------------------|-------------------|-------------------------------------------------------------------------------------------------------|---------------------|------------------------|----------------|
| <b>Characteristics</b>                      | <b>Weighted N</b> | <b>Medical doctor (incl. specialists)</b>                                                             | <b>Chiropractor</b> | <b>Physiotherapist</b> | <b>Nurse</b>   |
| Daily                                       | 1056320           | 80.3 (76.9-83.8)                                                                                      | 8.5 (7.3- 9.8)      | 5.5 (4.4- 6.6)         | 6.5 (5.1- 7.9) |
| Occasional                                  | 280471            | 79.5 (77.3-81.6)                                                                                      | 15.2 (12.3-18.1)    | 13.6 (10.5-16.7)       | 7.9 (4.4-11.5) |
| Not at all                                  | 4338906           | 88.7 (87.8-89.7)                                                                                      | 15.9 (14.6-17.3)    | 11.8 (10.4-13.2)       | 6.5 (5.8- 7.2) |
| Type of drinker                             |                   |                                                                                                       |                     |                        |                |
| Regular                                     | 3457259           | 85.7 (84.5-86.8)                                                                                      | 17.1 (15.4-18.8)    | 11.3 (10.7-11.9)       | 5.8 (5.0- 6.6) |
| Occasional                                  | 987033            | 86.9 (84.6-89.3)                                                                                      | 11.0 (10.0-12.0)    | 9.7 (6.7-12.6)         | 8.3 (6.5-10.1) |
| Did not drink                               | 1207389           | 89.6 (87.3-91.8)                                                                                      | 10.1 (9.3-10.9)     | 9.7 (7.4-12.0)         | 7.3 (5.7- 8.9) |
| Physical activity                           |                   |                                                                                                       |                     |                        |                |
| Active                                      | 2946824           | 85.2 (84.2-86.2)                                                                                      | 16.5 (14.7-18.4)    | 11.3 (10.0-12.6)       | 6.3 (5.5- 7.1) |
| Moderate active                             | 1207048           | 87.2 (86.0-88.3)                                                                                      | 14.3 (12.9-15.7)    | 10.4 (9.2-11.6)        | 6.4 (5.0- 7.7) |
| Inactive                                    | 1306891           | 89.9 (88.7-91.1)                                                                                      | 10.2 (8.8-11.6)     | 8.9 (7.4-10.4)         | 7.6 (6.5- 8.6) |
| NA(age <18)†                                | 94521             | 80.9 (74.5-87.4)                                                                                      | 17.3 (10.9-23.8)    | 20.4 (9.9-30.9)        | 5.5 (0.0-11.0) |
| BMI classification - International standard |                   |                                                                                                       |                     |                        |                |
| Underweight                                 | 92489             | 78.9 (71.0-86.8)                                                                                      | 10.6 (3.1-18.1)     | 3.5 (0.3- 6.6)         | 9.7 (1.5-17.9) |
| Normal weight                               | 1922755           | 83.8 (82.7-84.9)                                                                                      | 13.9 (12.0-15.8)    | 11.2 (9.8-12.5)        | 5.1 (4.3- 5.9) |
| Overweight (incl. obese)                    | 3168292           | 88.2 (87.3-89.1)                                                                                      | 15.6 (14.1-17.2)    | 10.6 (9.6-11.5)        | 7.1 (6.3- 7.9) |
| NA(age<18 or pregnant)†                     | 95524             | 81.1 (74.8-87.4)                                                                                      | 17.5 (10.6-24.5)    | 20.6 (10.2-31.0)       | 5.4 (0.1-10.8) |
| Perceived general health                    |                   |                                                                                                       |                     |                        |                |

|                        |                   | <b>Prevalence (95% CI) of having received regular health care from different health professionals</b> |                     |                        |                 |
|------------------------|-------------------|-------------------------------------------------------------------------------------------------------|---------------------|------------------------|-----------------|
| <b>Characteristics</b> | <b>Weighted N</b> | <b>Medical doctor (incl. specialists)</b>                                                             | <b>Chiropractor</b> | <b>Physiotherapist</b> | <b>Nurse</b>    |
| Poor                   | 462785            | 92.9 (89.5-96.2)                                                                                      | 7.6 (3.4-11.7)      | 10.8 (8.6-13.0)        | 12.3 (9.2-15.5) |
| Fair                   | 943777            | 87.5 (83.8-91.2)                                                                                      | 10.0 (7.8-12.2)     | 10.3 (8.3-12.3)        | 7.8 (6.7- 9.0)  |
| Good                   | 1925078           | 87.3 (86.4-88.3)                                                                                      | 14.9 (14.2-15.7)    | 11.3 (9.3-13.3)        | 7.0 (6.1- 7.9)  |
| Very good              | 1683598           | 84.9 (82.0-87.7)                                                                                      | 17.6 (15.3-19.9)    | 10.3 (8.7-12.0)        | 4.9 (3.8- 6.0)  |
| Excellent              | 654091            | 84.3 (80.4-88.2)                                                                                      | 16.8 (14.8-18.9)    | 10.5 (7.1-13.8)        | 3.7 (2.3- 5.1)  |

BMI – body mass index; CCHS – Canadian Community Health Survey; CI – confidence interval; NA – not applicable; NS – not stated; PR – prevalence ratio

\*Weighted using Canadian Community Health Survey sampling weights provided by Statistics Canada to provide population estimates

†NA=not applicable according to population exclusions; NS=not stated or responses without enough information for classification
